# Supplementary material
Source: publisher figshare collection journal article supplement (https://acs.figshare.com/ndownloader/files/15111866)
Supplement: Supplementary file 1 [file 15111866]

## Supporting Information

### Equilibrium protein adsorption on nanometric vegetable-oil hybrid film/water interface using neutron reflectometry

Antigoni Theodoratou,<sup>1,4\*</sup> Lay-Theng Lee,<sup>2</sup> Julian Oberdisse,<sup>3\*</sup> Anne Aubert-Pouëssel<sup>1</sup>

<sup>1</sup> *Institut Charles Gerhardt Montpellier (ICGM), UMR5253 CNRS-UM-ENSCM, Place Eugène Bataillon, 34090 Montpellier, France.*

<sup>2</sup> *Laboratoire Léon Brillouin, CEA-CNRS, CEA Saclay, Université Paris-Saclay, 91191 Gif-sur-Yvette, France.*

<sup>3</sup> *Laboratoire Charles Coulomb (L2C), UMR5221 CNRS-UM, Place Eugène Bataillon, 34090 Montpellier, France.*

<sup>4</sup> *European Institute of Membranes (IEM), UMR5635 CNRS-ESNCM, 300 Avenue du Professeur Emile Jeanbrau, 34090 Montpellier, France.*

\*E-mail: antigoni.theodoratou@umontpellier.fr, julian.oberdisse@umontpellier.fr

#### CONTENTS

|                                                                                                                                                                                                                                                                                                                                                                                                                                 |    |
|---------------------------------------------------------------------------------------------------------------------------------------------------------------------------------------------------------------------------------------------------------------------------------------------------------------------------------------------------------------------------------------------------------------------------------|----|
| Schematic representation of proteins adsorbed at the air-water (a) and the ICO-water (b) interface. In the lower panel, the different cases studied are shown: the effect of salt, protein type and protein concentration (Figure S1).....                                                                                                                                                                                      | S2 |
| (a) Chemical structure of CO and ICO (b) transparent cross-linked film after spreading 1g of ICO on water (surface area of 50.3 cm <sup>2</sup> ), (c) wide angle X-Ray scattering spectra for castor oil, ICO and cross-linked film, (d) contact angle of cross-linked film and (e) atomic force microscopy image of BSA on cross-linked film. Data are taken from references and are adapted with permission (Figure S2)..... | S2 |
| ATR spectra plotted as a) transmittance versus wavelength and b) relative intensity at 2925 cm <sup>-1</sup> and 1742 cm <sup>-1</sup> as a function of time. The ICO films were spin-coated onto glass plates at room temperature (100-200 nm of thickness) (Figure S3).....                                                                                                                                                   | S3 |
| Protein adsorption of BSA (1mg/ml), BSA (5mg/ml), lysozyme (1mg/ml) and lysozyme (5mg/ml) at the ICO-water interface in presence of salt, as a function of their bulk molar concentration (Figure S4).....                                                                                                                                                                                                                      | S3 |

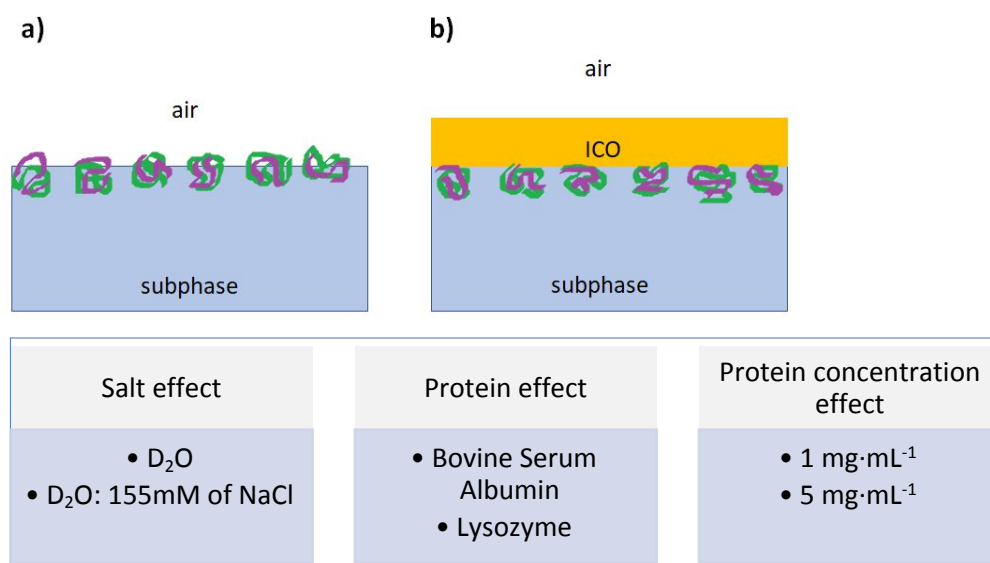

**Figure S1:** Schematic representation of proteins adsorbed at the air-water (a) and the ICO-water (b) interface. In the lower panel, the different cases studied are shown: the effect of salt, protein type and protein concentration.

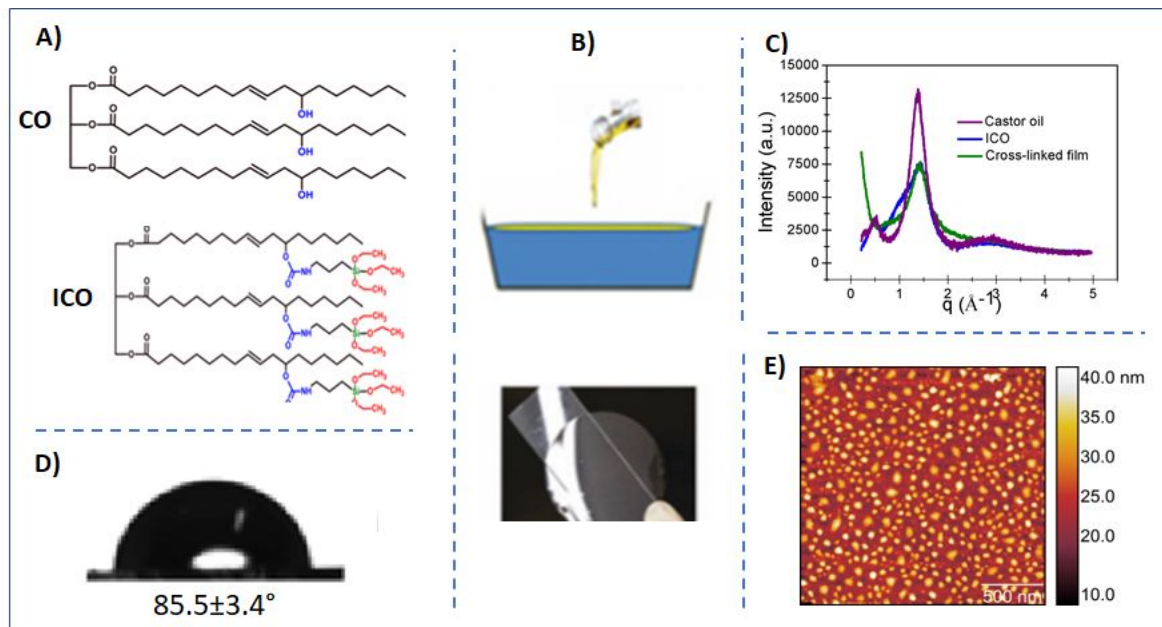

**Figure S2:** (a) Chemical structure of CO and ICO (b) transparent cross-linked film after spreading 1g of ICO on water (surface area of 50.3 cm<sup>2</sup>), (c) wide angle X-Ray scattering spectra for castor oil, ICO and cross-linked film, (d) contact angle of cross-linked film and (e) atomic force microscopy image of BSA on cross-linked film. Data are taken from references <sup>7, 10</sup> and are adapted with permission.

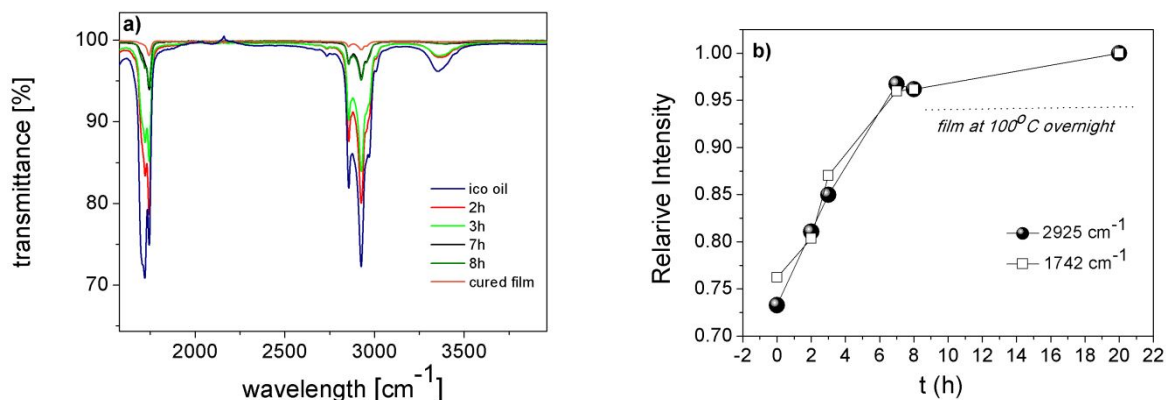

**Figure S3:** ATR spectra plotted as a) transmittance versus wavelength and b) relative intensity at 2925  $\text{cm}^{-1}$  and 1742  $\text{cm}^{-1}$  as a function of time. The ICO films were spin-coated onto glass plates at room temperature (100-200 nm of thickness).

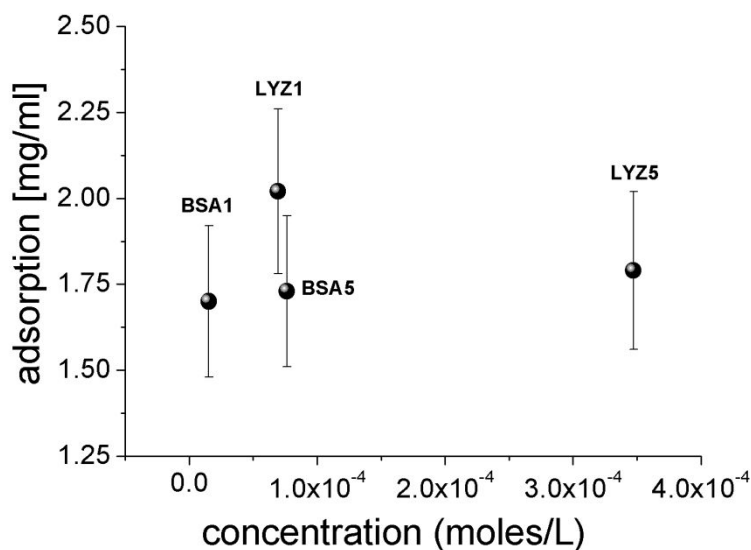

**Figure S4:** Protein adsorption of BSA (1mg/ml), BSA (5mg/ml), lysozyme (1mg/ml) and lysozyme (5mg/ml) at the ICO-water interface in presence of salt, as a function of their bulk molar concentration.
